# Supplementary material for: Ethanolamine is a novel STAT-3 dependent cardioprotective agent
Source: Springer Nature journal article supplement (doi:10.1007/s00395-010-0125-0), 2010-10-12
Supplement: MOESM1 [file 395_2010_125_MOESM1_ESM.docx]

**Effect of ethanolamine on hemodynamic parameters in the Langendorf perfused rat heart**

Treatment with ethanolamine at different concentrations did not affect hemodynamic parameters.
